## Standardized comparison of cardiovascular risk factors prevalence in Spanish women and men living with HIV and in the general population

Camps-Vilaro A.<sup>1</sup>; Perez-Fernandez S.<sup>1</sup>; Teira R.<sup>2</sup>; Estrada V.<sup>3</sup>; Domingo P.<sup>4</sup>; R Degano I.<sup>1</sup>; Marrugat J.<sup>1</sup>

<sup>1</sup>Hospital del Mar Medical Research Institute (IMIM), Barcelona, Spain

<sup>2</sup>Hospital Sierrallana, Infectious Diseases Unit, Torrelavega, Spain

<sup>3</sup>Hospital Clinico San Carlos, Infectious Diseases Unit, Madrid, Spain

<sup>4</sup>Hospital de la Santa Creu i Sant Pau, Department of Infectious Diseases, Barcelona, Spain

**Funding Acknowledgements:** Type of funding sources: Public grant(s) – National budget only. Main funding source(s): Spain's Ministry of Science and Innovation (Madrid, Spain), co-financed with European Union European Regional Development Funds –ERDF- [CIBERCV CB16/11/00229]; the Health Department of the Generalitat de Catalunya (Barcelona, Spain) through the Agència de Gestió d'Ajuts Universitaris de Recerca de Catalunya (AGAUR) (Barcelona, Spain) [2017SGR222].

**OnBehalf:** DARIOS and VACH investigators

**Background:** People living with HIV (PLWH) have an increased risk of cardiovascular (CV) disease, likely due to a higher prevalence of CV risk factors. We compared age-standardized prevalence and management of CV risk factors in PLWH to that of general population in Spain.

**Methods:** Blood pressure, lipid, glucose and anthropometric profile were cross-sectionally compared along with treatment of hypertension, dyslipidemia, and diabetes in a general population cohort and a PLWH cohort. Prevalence rates were standardized by the direct method by 10-year age groups in European standard populations by gender.

**Results:** We included 39,598 individuals aged 35 to 74 years: 28,360 from the general population cohort and 11,238 from the PLWH cohort. Compared to general population, PLWH had a higher concentration of triglycerides (>35mg/dL in women and >26mg/dL in men), and a higher prevalence of metabolic syndrome (>10% and >7.8%) and diabetes (>8.5% and >5.3%) (Table). The proportion of treated diabetes, dyslipidemia, and hypertension were up to 3-fold lower in both women and men living with HIV than in general population (Table).

**Conclusions:** Lipid, gluco-metabolic profiles were significantly worse in PLWH compared to general population. In addition, PLWH were less often treated for diagnosed diabetes, dyslipidemia, and hypertension.

CV risk factor standardized prevalence

| Cardiovascular risk factor            | WOMEN                  |                    |                    | MEN                    |                    |        |
|---------------------------------------|------------------------|--------------------|--------------------|------------------------|--------------------|--------|
|                                       | People living with HIV | p-Value            | General population | People living with HIV | p-Value            |        |
| General population                    | N = 15,159             | N = 2,171          |                    | N = 13,201             | N = 9,067          |        |
| Hypertension, %                       | 27.4 (26.7 - 28.0)     | 24.8 (21.6 - 28.1) | 0.136              | 29.0 (28.2 - 29.7)     | 22.9 (21.4 - 24.4) | <0.001 |
| Treated hypertension, % <sup>a</sup>  | 62.7 (60.7 - 64.7)     | 18.9 (13.5 - 24.4) | <0.001             | 59.3 (57.5 - 61.1)     | 24.1 (21.0 - 27.1) | <0.001 |
| Triglycerides, mg/dL <sup>b</sup>     | 99 (99 - 100)          | 134 (134 - 148)    | <0.001             | 122 (121 - 122)        | 148 (148 - 164)    | <0.001 |
| Total cholesterol, mg/dL              | 214 (213 - 215)        | 207 (199 - 215)    | 0.111              | 214 (213 - 216)        | 195 (191 - 198)    | <0.001 |
| Treated dyslipidaemia, % <sup>c</sup> | 14.0 (13.5 - 14.6)     | 7.80 (5.60 - 10.0) | <0.001             | 15.1 (14.5 - 15.7)     | 7.8 (6.8 - 8.7)    | <0.001 |
| Glucose, mg/dL                        | 97 (96 - 97)           | 103 (98 - 107)     | 0.007              | 104 (103 - 105)        | 106 (104 - 109)    | 0.122  |
| Diabetes, %                           | 10.6 (10.1 - 11.1)     | 19.1 (16.0 - 22.1) | <0.001             | 15.4 (14.8 - 16.0)     | 20.7 (19.2 - 22.2) | <0.001 |
| Treated diabetes, % <sup>d</sup>      | 34.4 (31.5 - 37.2)     | 12.8 (8.00 - 17.5) | <0.001             | 40.0 (37.1 - 42.9)     | 16.6 (13.9 - 19.3) | <0.001 |
| Metabolic Syndrome, %                 | 20.5 (19.8 - 21.1)     | 31.1 (25.8 - 36.4) | <0.001             | 27.9 (27.1 - 28.7)     | 35.7 (33.1 - 38.2) | <0.001 |

Values are expressed as mean (95% confidence interval). a Among patients with history of hypertension. b Mean (95% confidence interval) were obtained with log-transformed values. c Among all cohort participants. d Among patients with history of diabetes. HDL-c, high density lipoprotein cholesterol; LDL-c, low density lipoprotein cholesterol
